# Supplementary material for: Discovery of the Pseudomonas Polyyne Protegencin by a Phylogeny-Guided Study of Polyyne Biosynthetic Gene Cluster Diversity
Source: PubMed Central journal article supplement (PMC8406139; doi:10.1128/mbio.00715-21), 2021-08-03
Supplement: mbio.00715-21-sf001.pdf [file mbio.00715-21-sf001.pdf]

Fig. S1

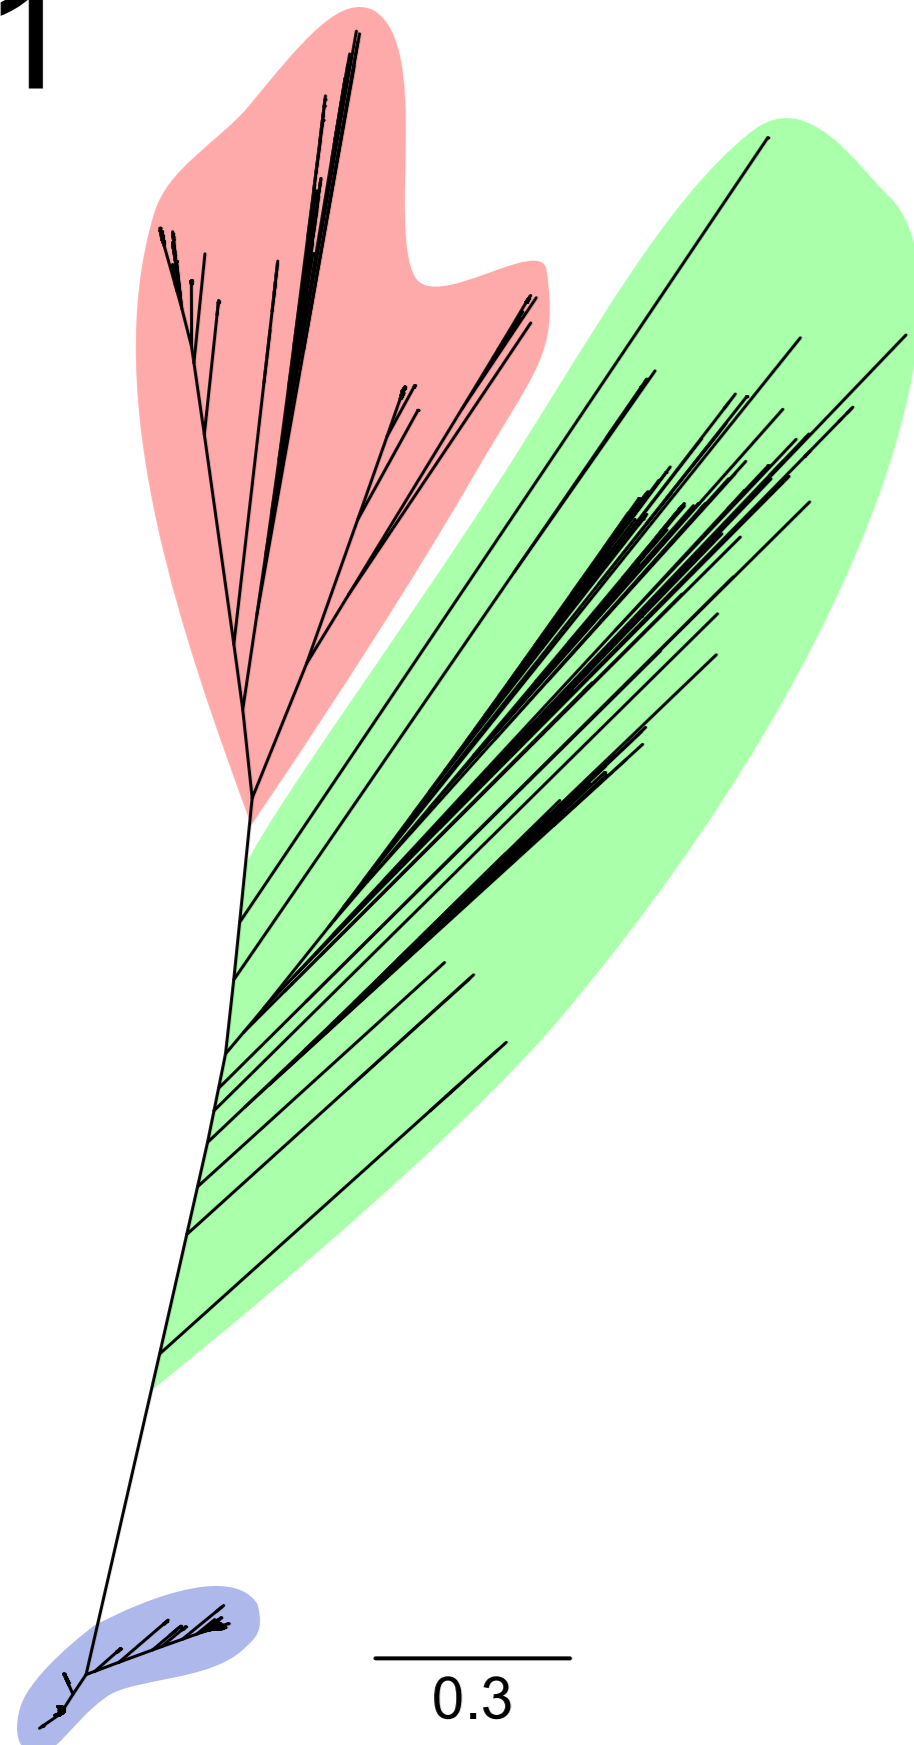

**a**

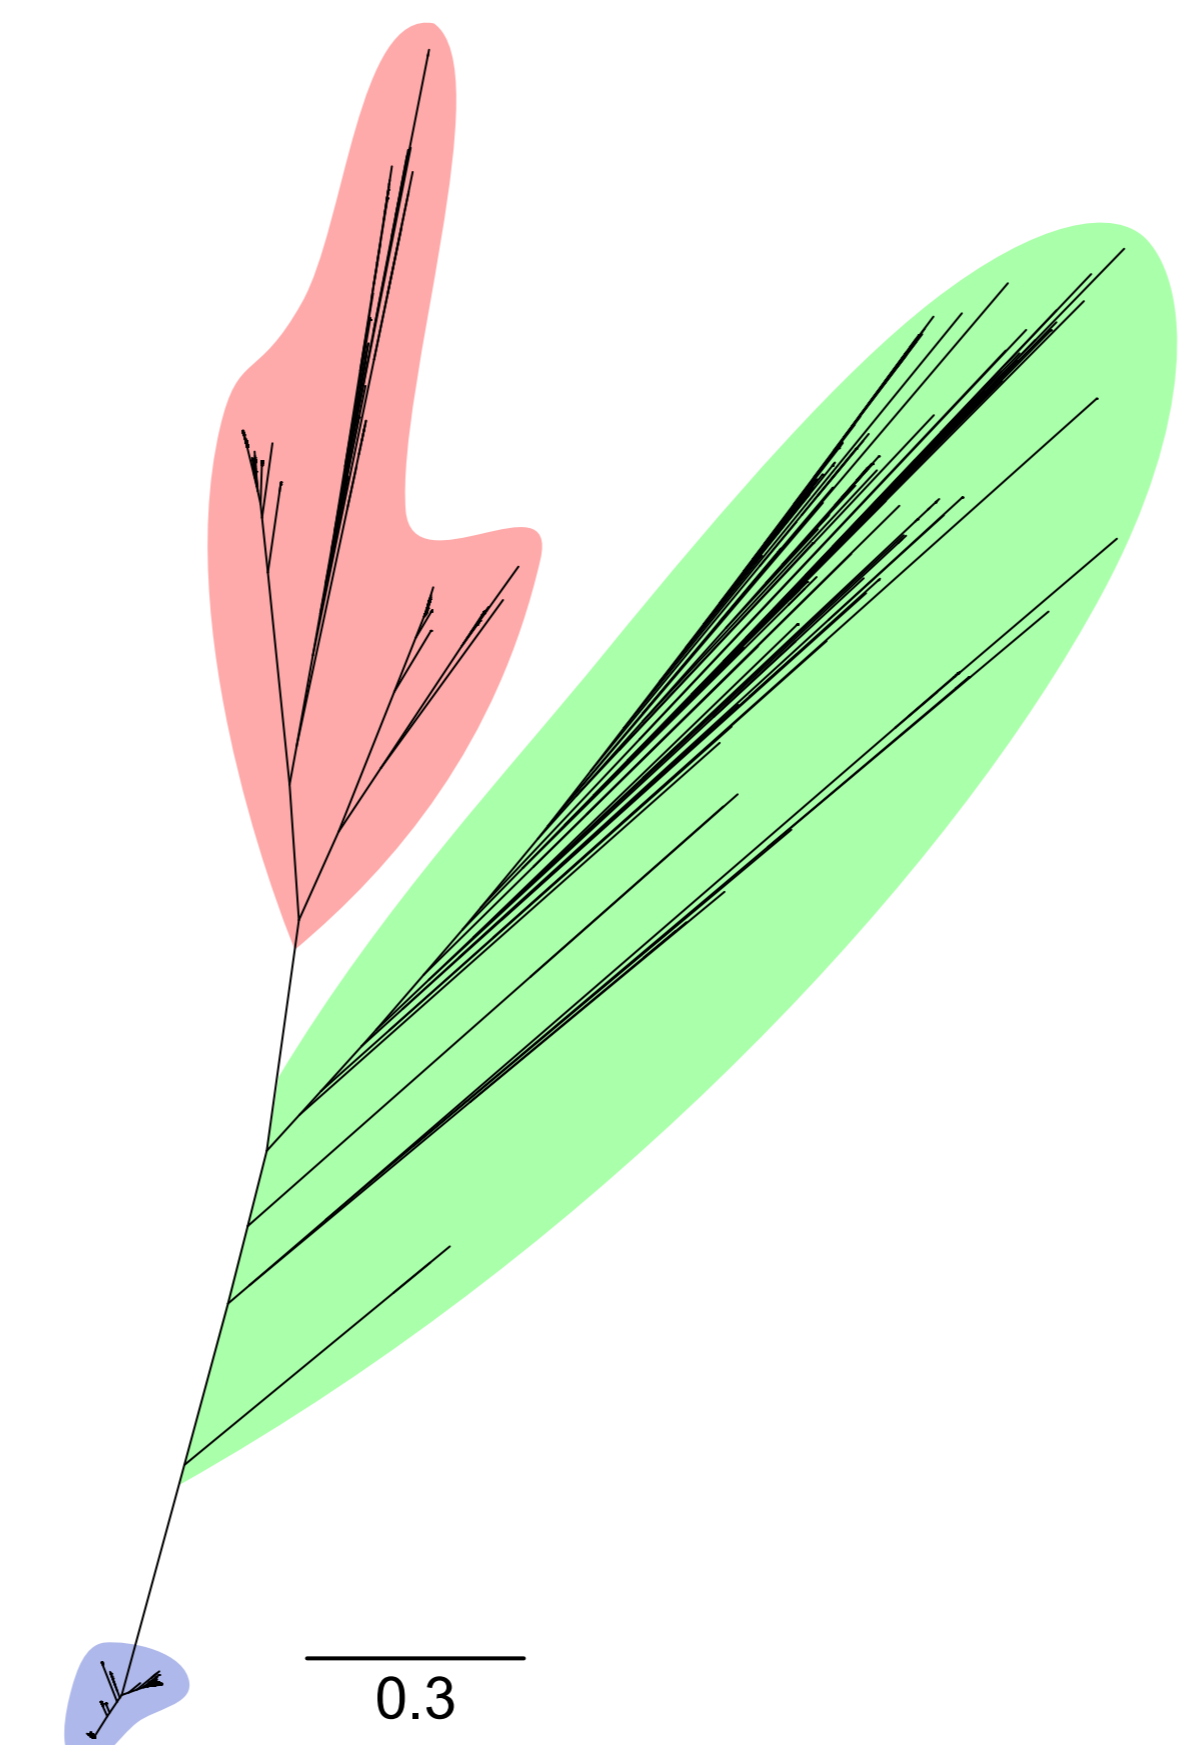

**b**

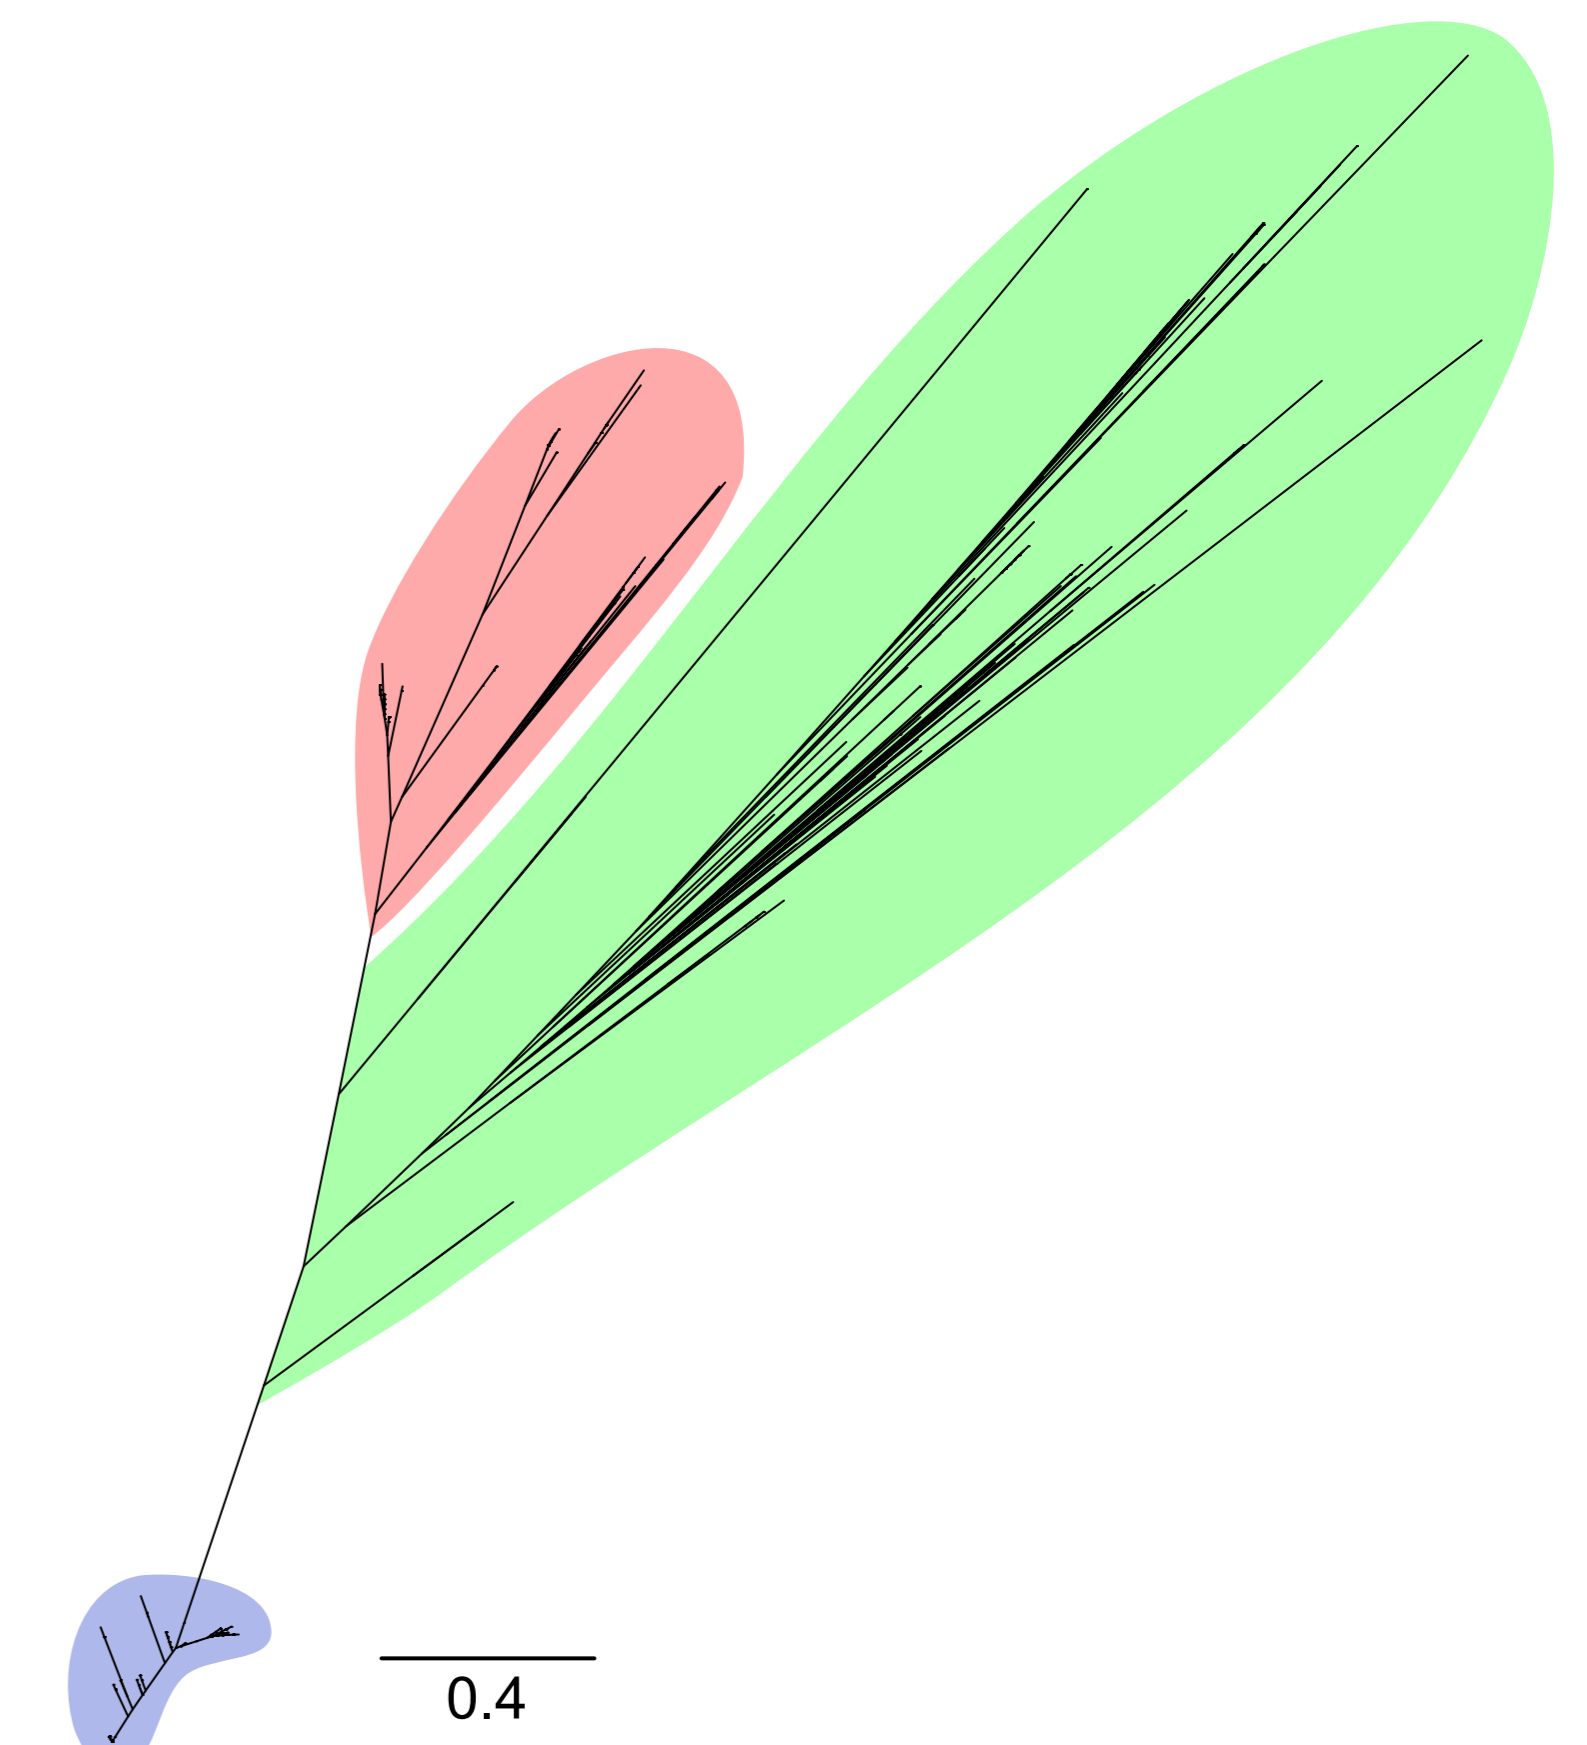

**c**

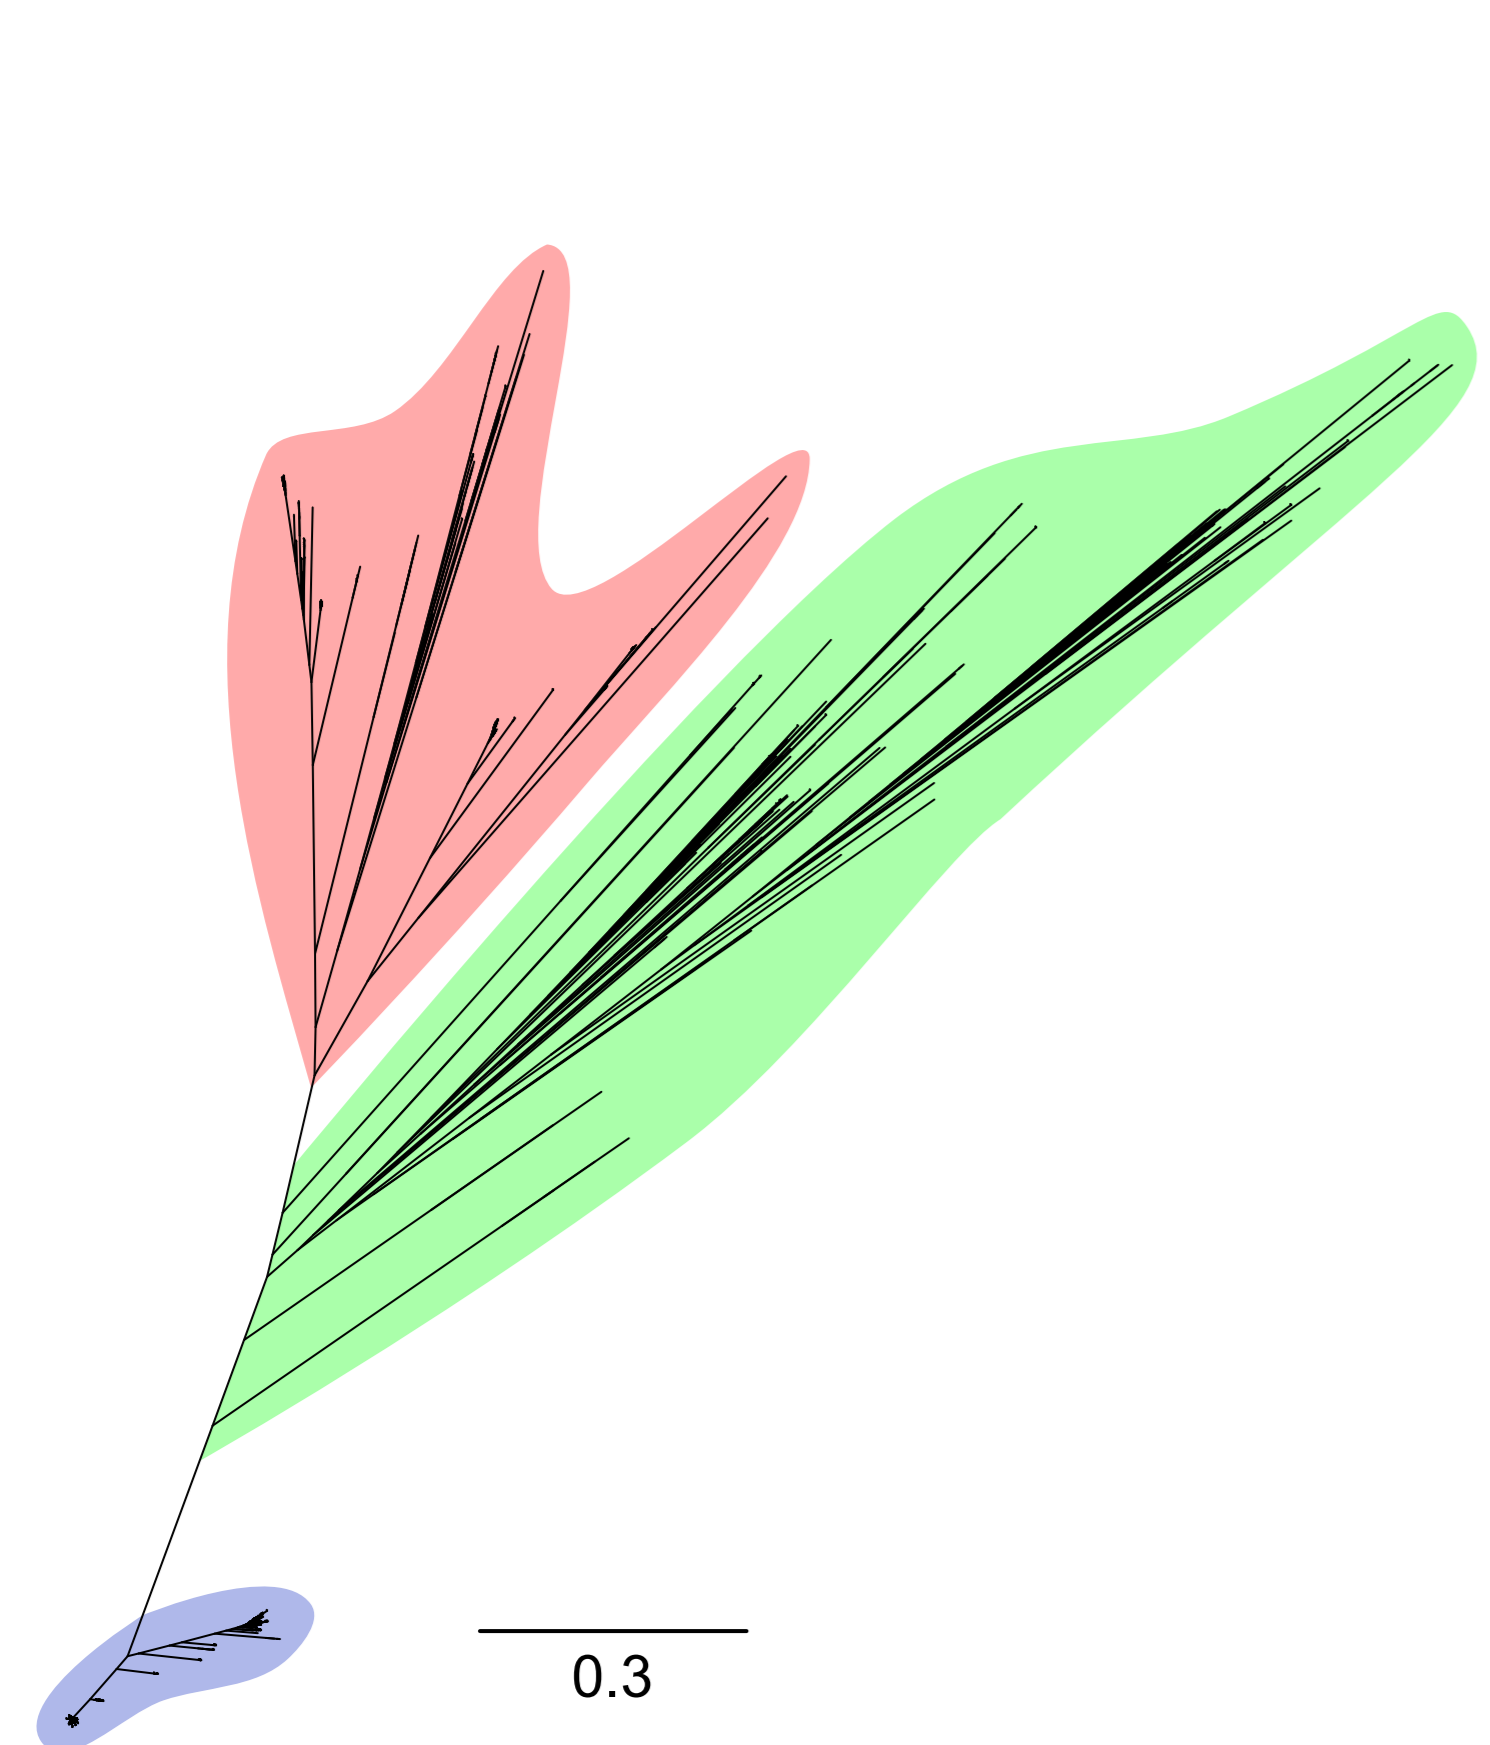

**d**

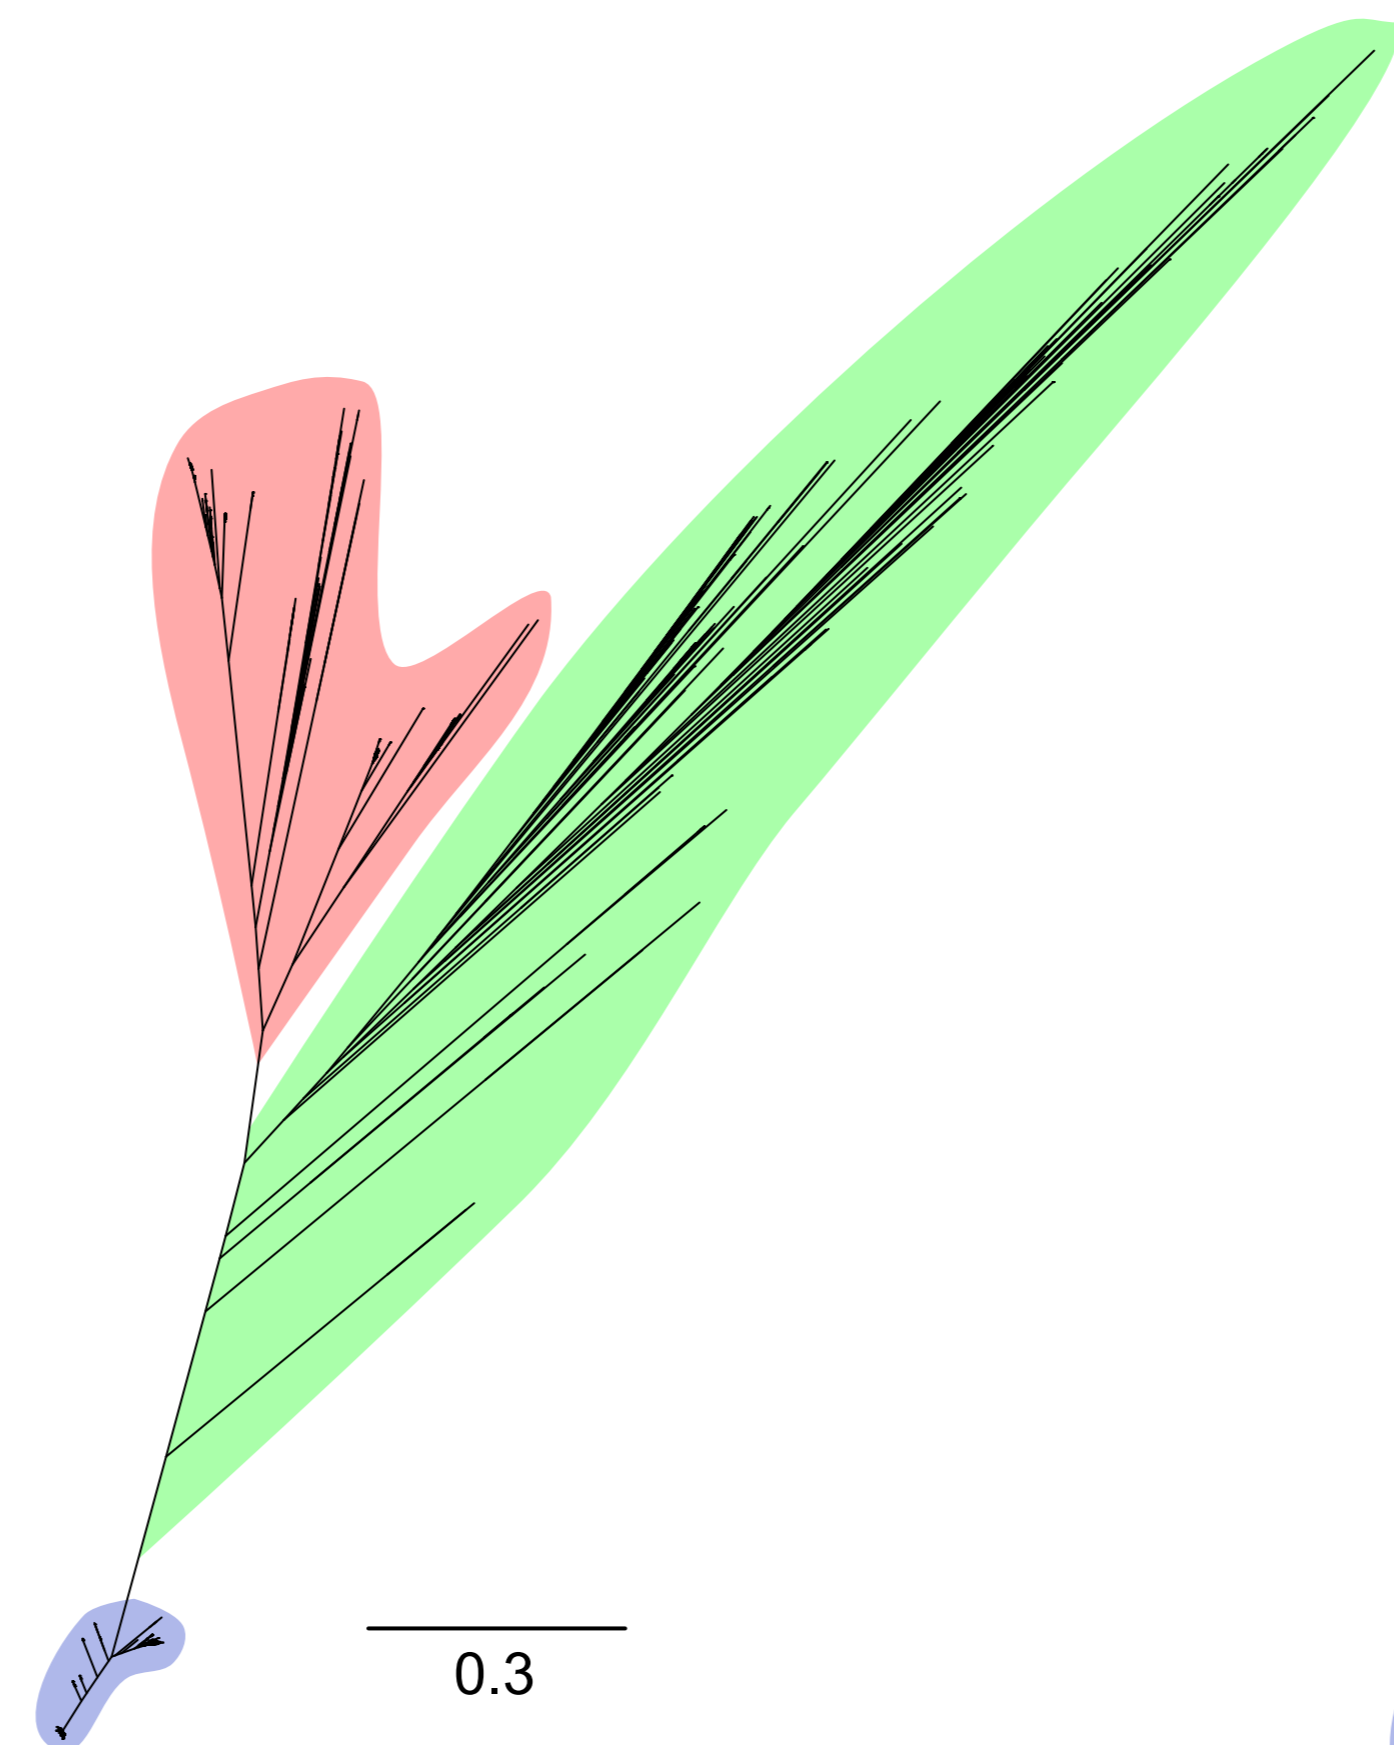

**e**

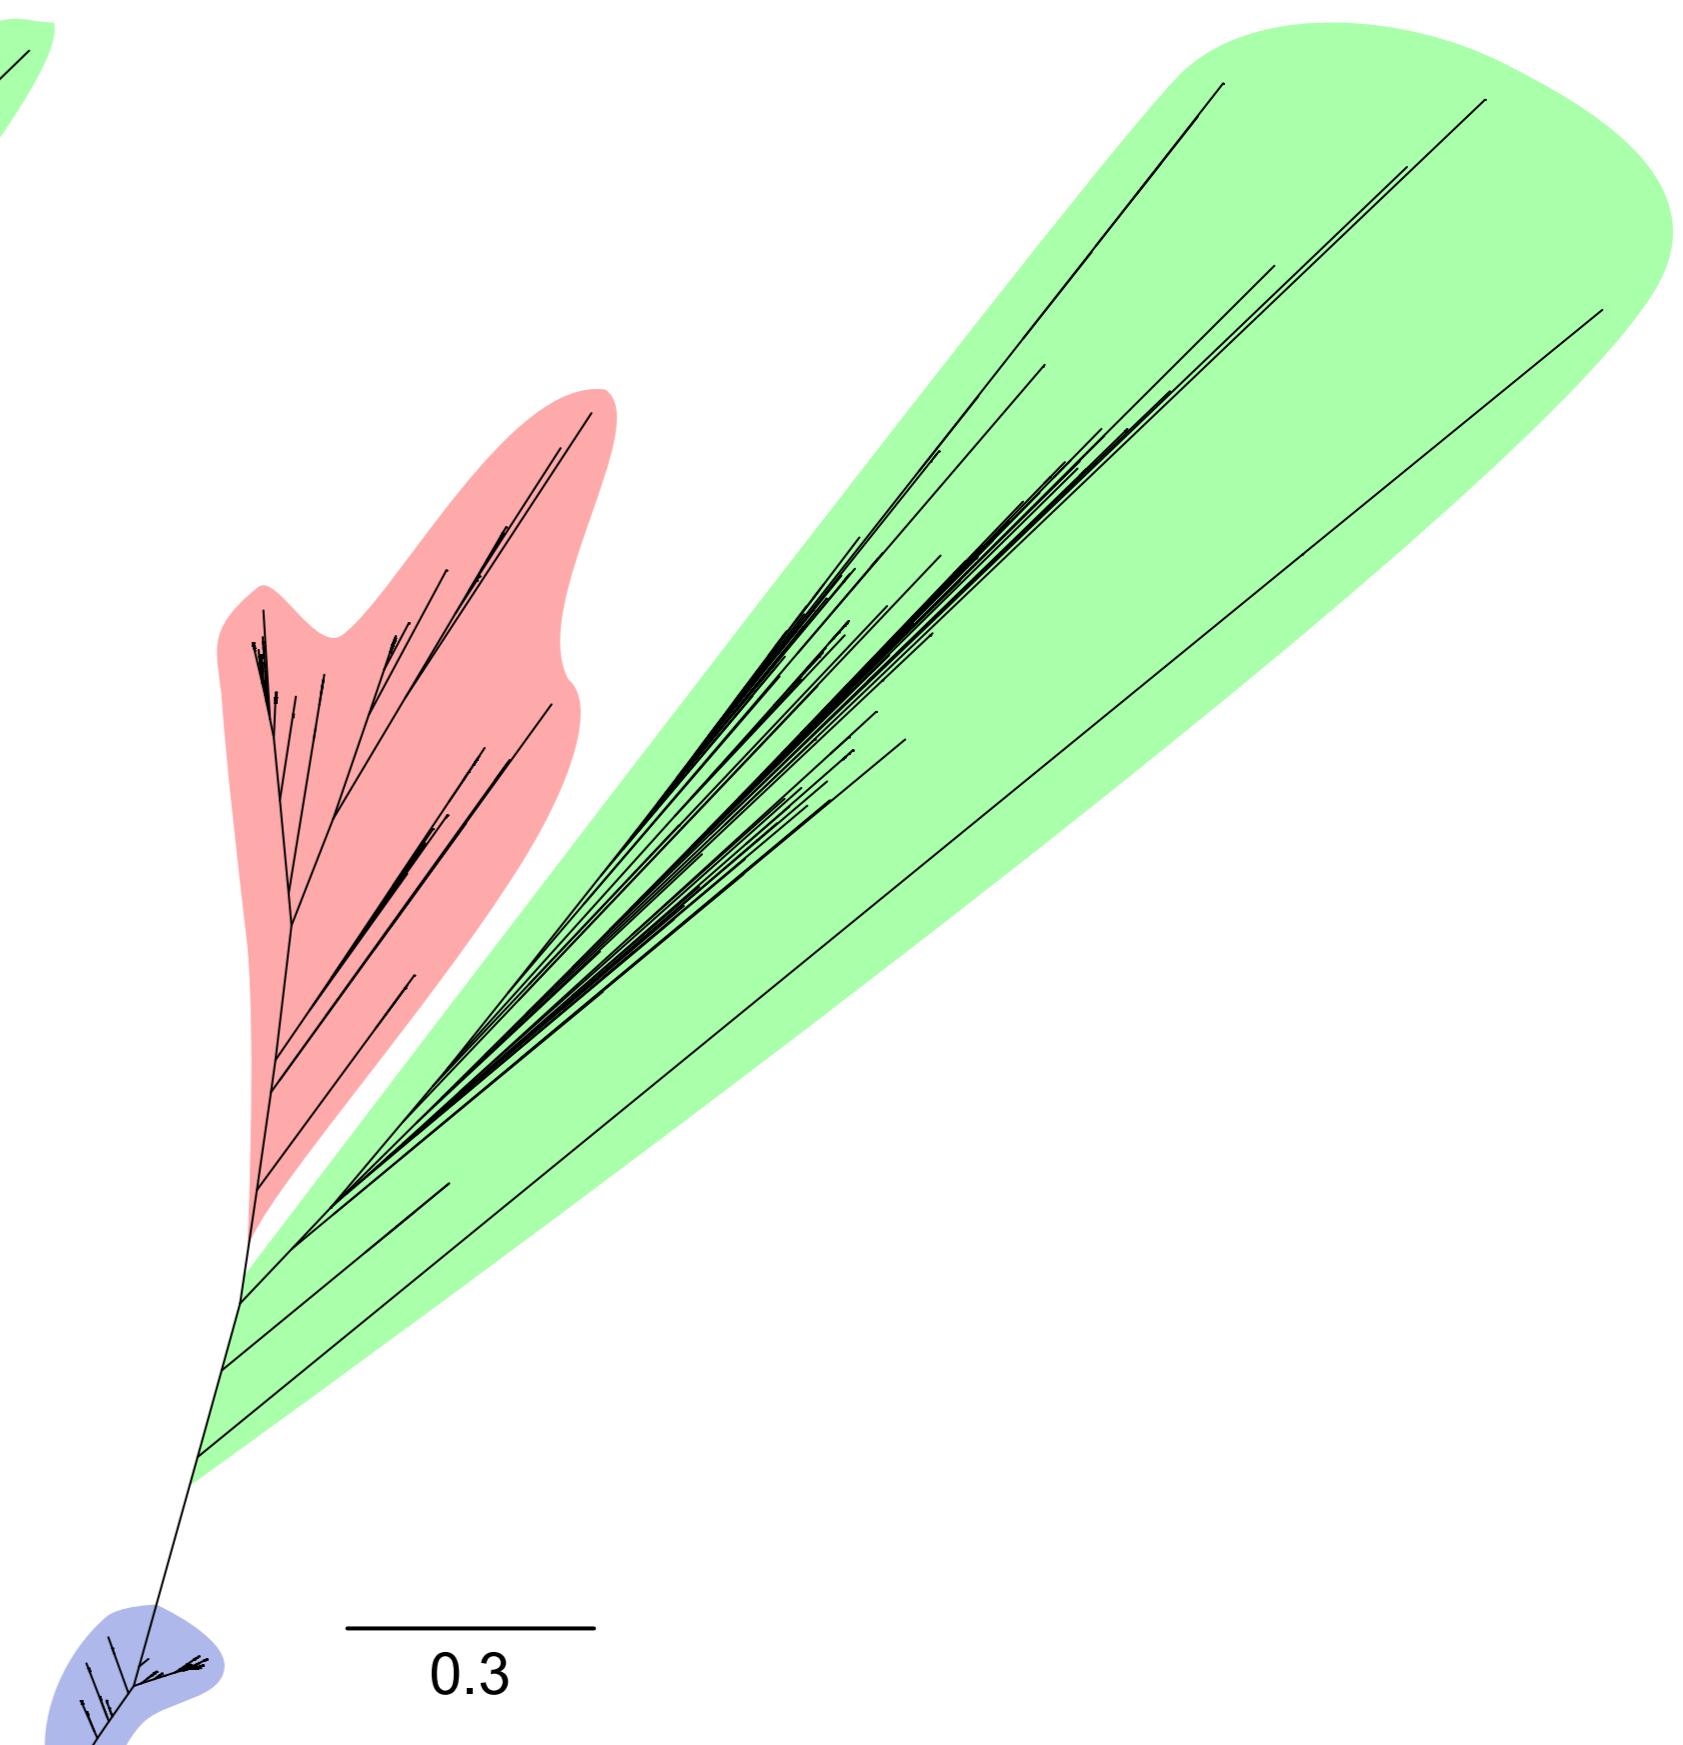

**f**
