# Supplementary material for: Discovery of the Pseudomonas Polyyne Protegencin by a Phylogeny-Guided Study of Polyyne Biosynthetic Gene Cluster Diversity
Source: PubMed Central journal article supplement (PMC8406139; doi:10.1128/mbio.00715-21), 2021-08-03
Supplement: mbio.00715-21-sf002.pdf [file mbio.00715-21-sf002.pdf]

Fig. S2

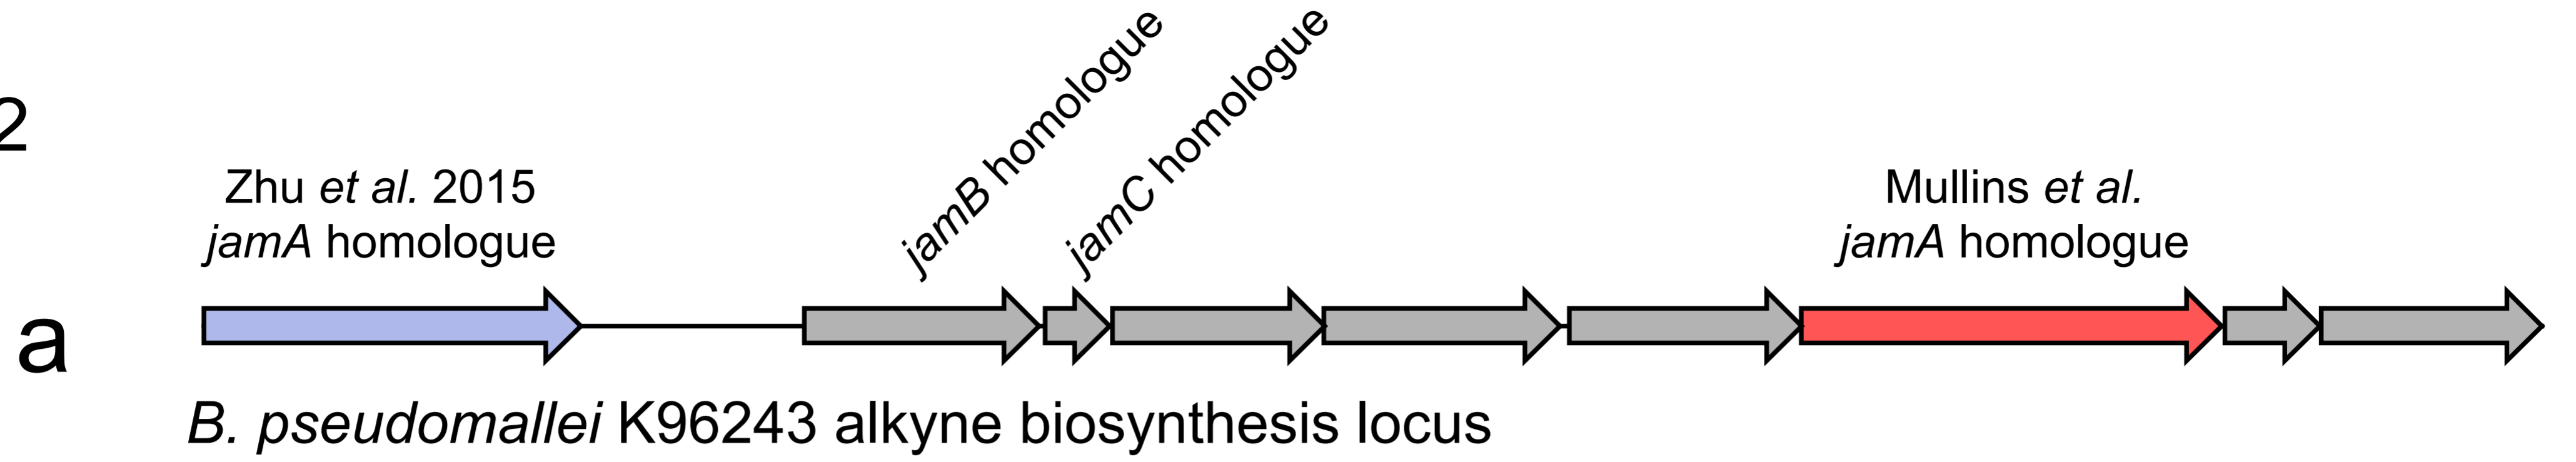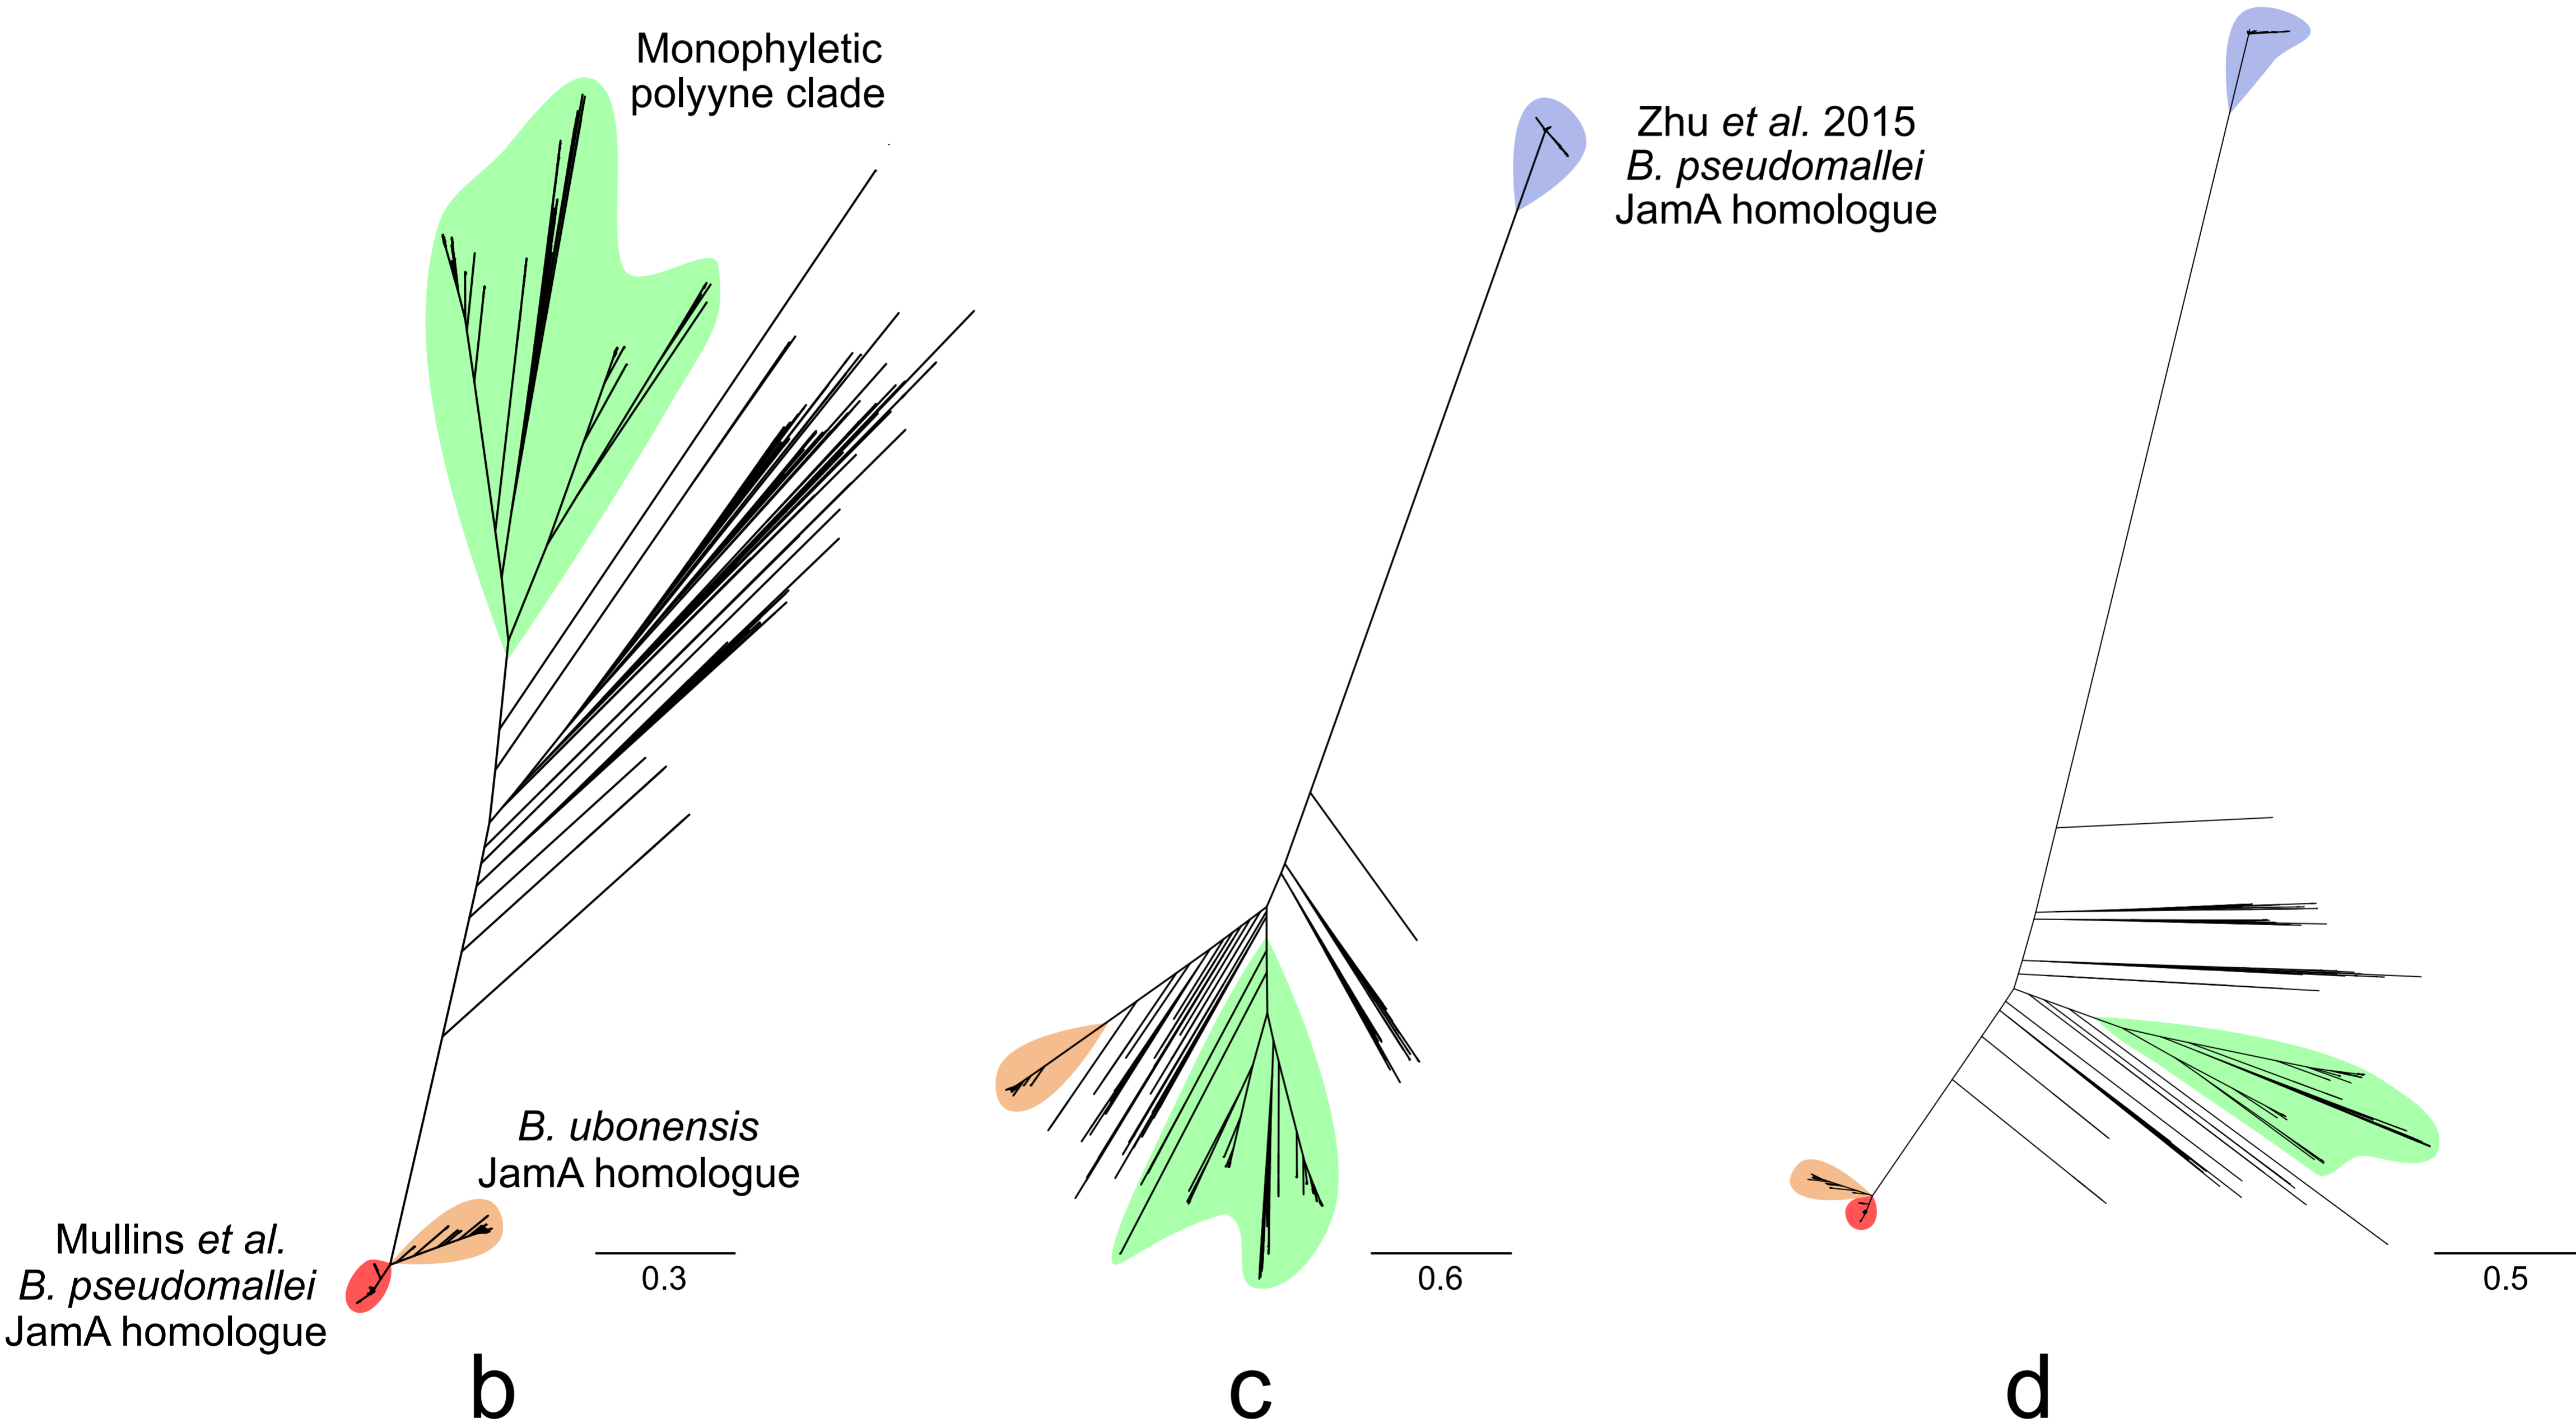

Monophyletic JamA polyyne clade

*B. ubonensis* JamA homologue

Mullins *et al.* *B. pseudomallei* JamA homologue

Zhu *et al.* 2015 *B. pseudomallei* JamA homologue
