# Supplementary material for: Discovery of the Pseudomonas Polyyne Protegencin by a Phylogeny-Guided Study of Polyyne Biosynthetic Gene Cluster Diversity
Source: PubMed Central journal article supplement (PMC8406139; doi:10.1128/mbio.00715-21), 2021-08-03
Supplement: mbio.00715-21-sf003.pdf [file mbio.00715-21-sf003.pdf]

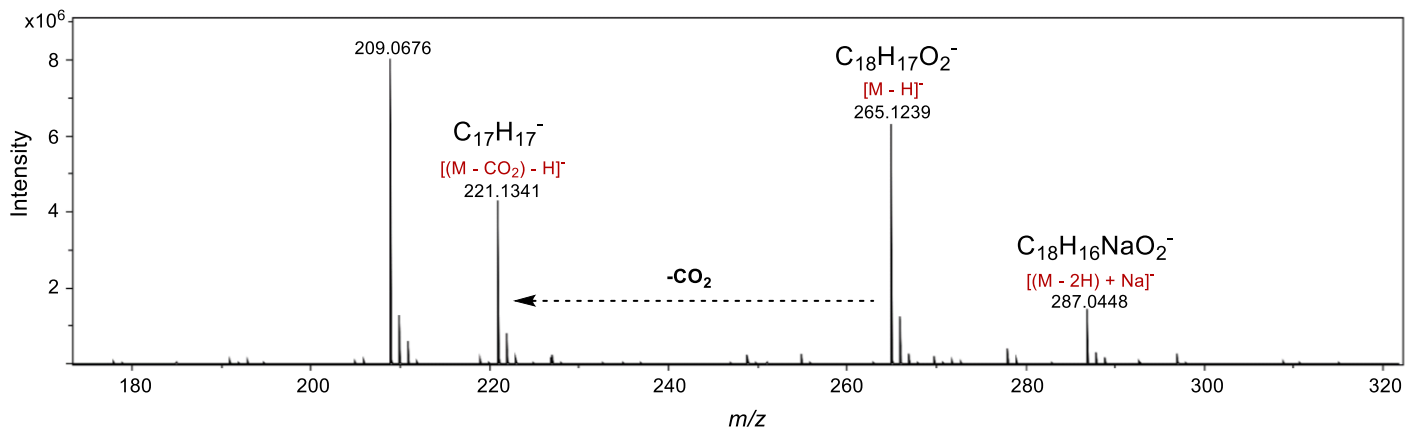

Fig. S3a

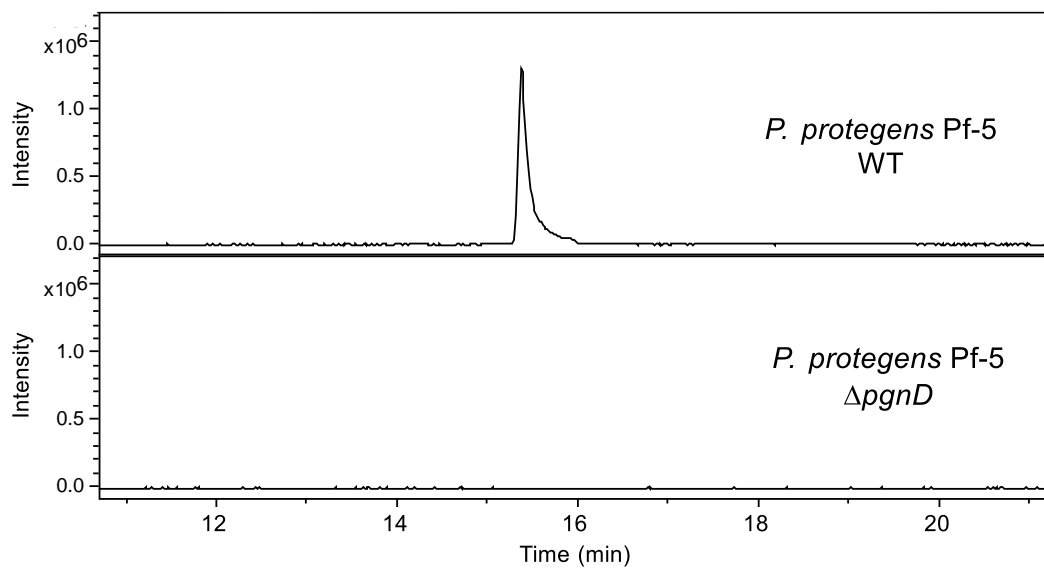

Fig. S3b

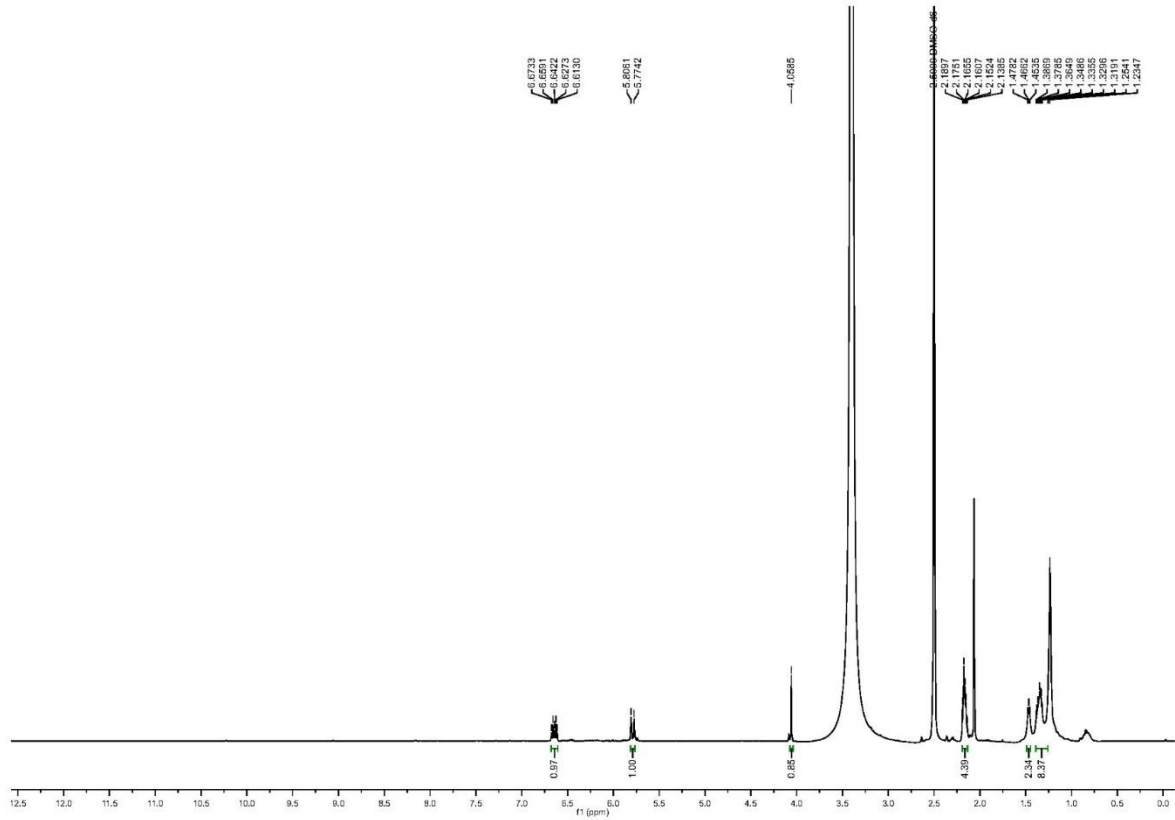

Fig. S3c

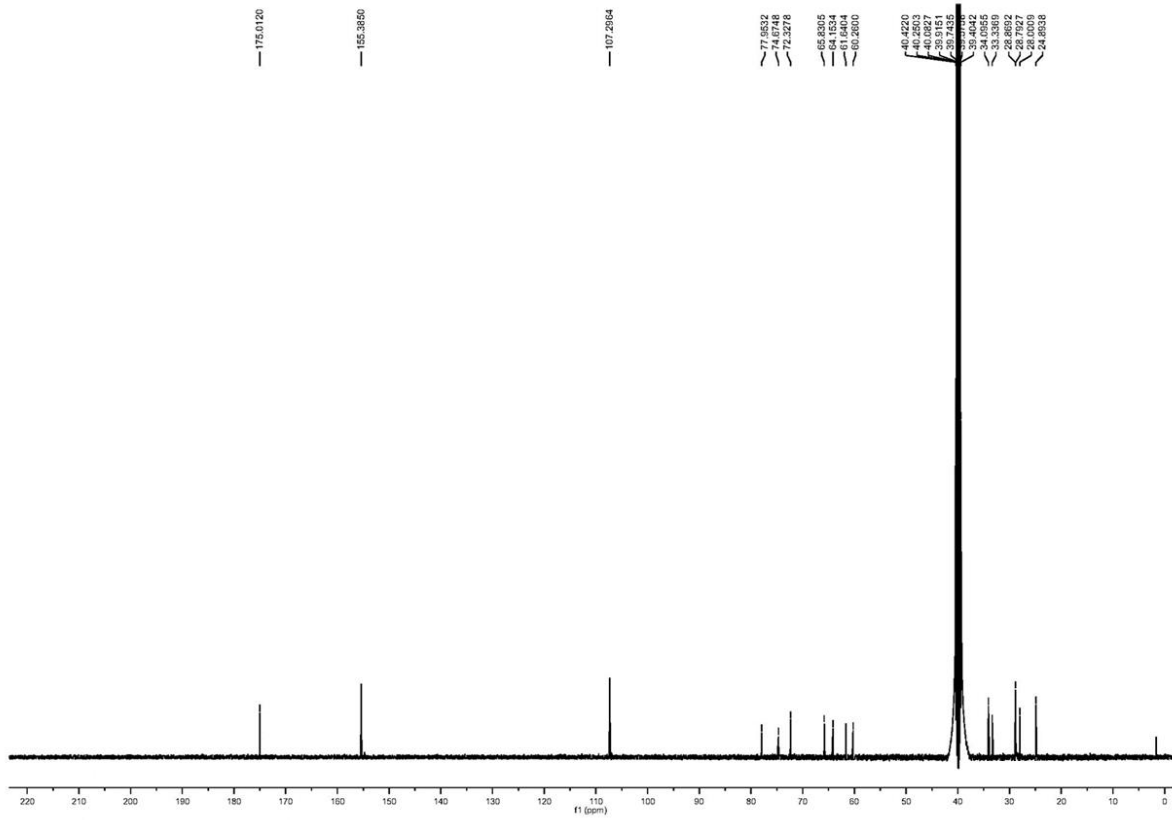

Fig. S3d

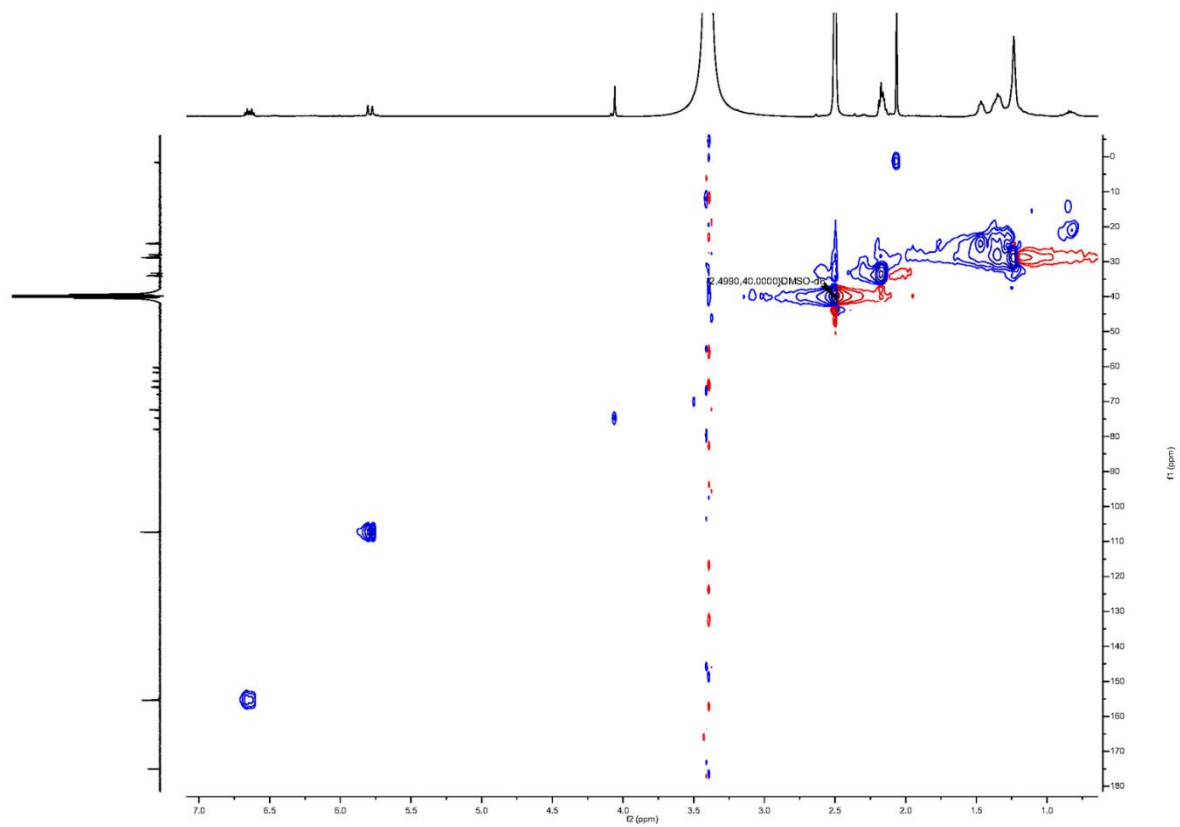

Fig. S3e

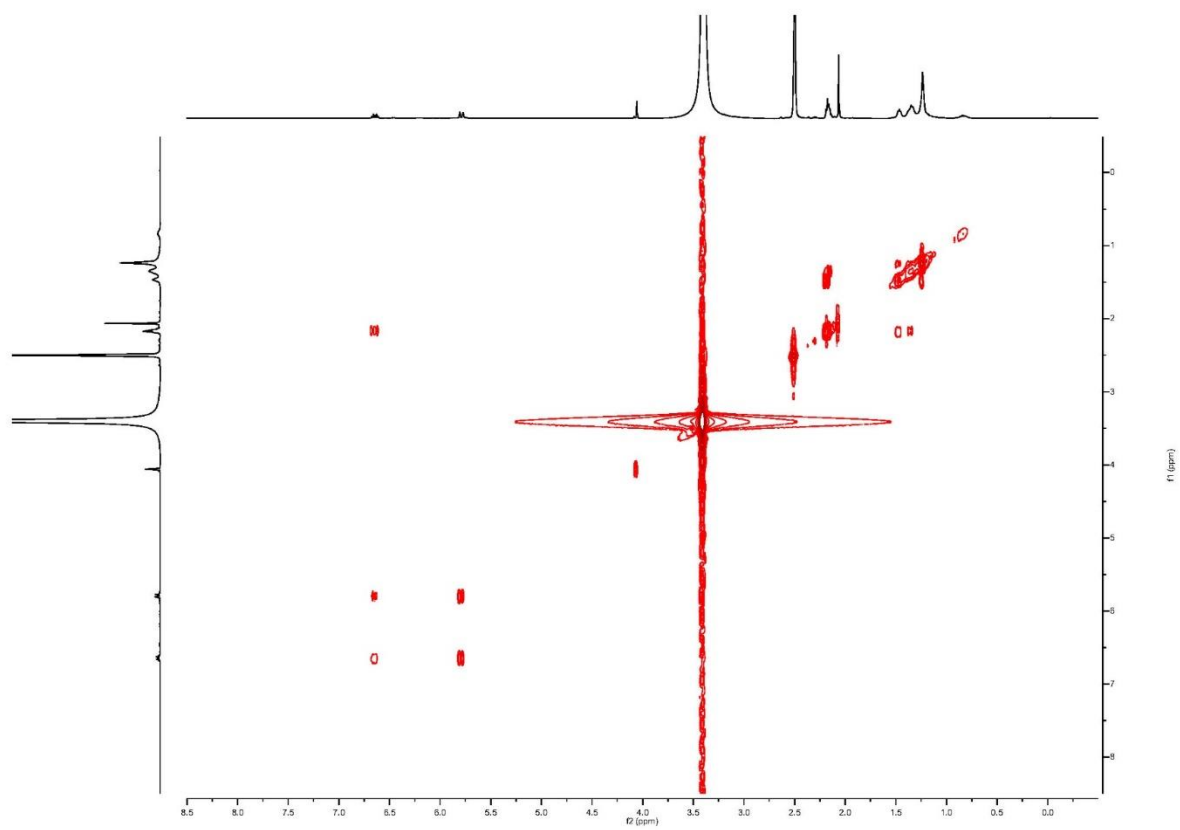

Fig. S3f

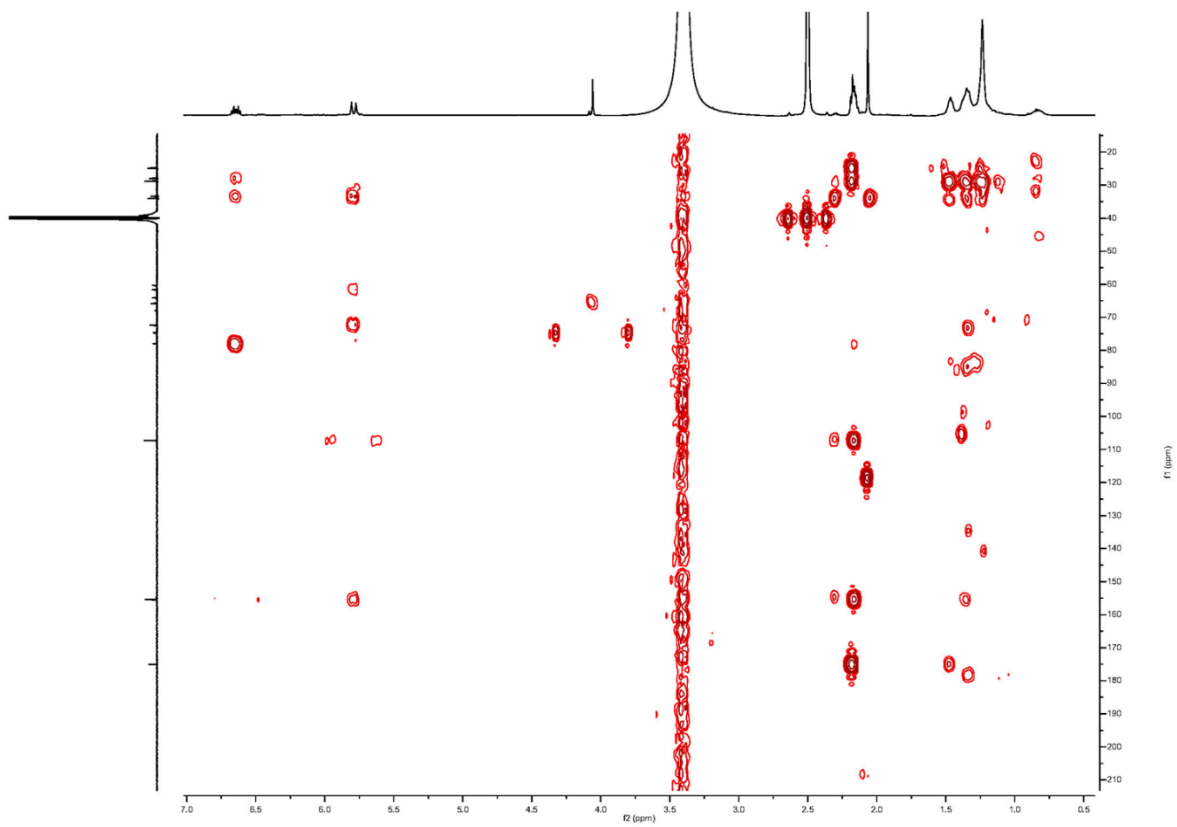

Fig. S3g
