# Supplementary material for: Discovery of the Pseudomonas Polyyne Protegencin by a Phylogeny-Guided Study of Polyyne Biosynthetic Gene Cluster Diversity
Source: PubMed Central journal article supplement (PMC8406139; doi:10.1128/mbio.00715-21), 2021-08-03
Supplement: mbio.00715-21-st001.pdf [file mbio.00715-21-st001.pdf]

**Table S1. Strains and plasmids used in this study for mutagenesis.**

| Strains/Plasmids                                    | Function                                                                    | Source or Reference                                          |
|-----------------------------------------------------|-----------------------------------------------------------------------------|--------------------------------------------------------------|
| <b>Strain</b>                                       |                                                                             |                                                              |
| <b><i>Escherichia coli</i></b>                      |                                                                             |                                                              |
| DH5 $\alpha$                                        | Tri-parental conjugation donor strain                                       | Invitrogen                                                   |
| HB101 pRK2013                                       | Tri-parental conjugation helper strain                                      | Figurski and Helinski (1979) [14]                            |
| <i>E. coli</i> TOP10                                | Competent cells for bulk preparation of pJET1.2- <i>Apr</i> <sup>R</sup>    | Invitrogen                                                   |
| <i>E. coli</i> XL1-Blue                             | Competent cells for bulk preparation of pJET1.2- <i>Apr</i> <sup>R</sup>    | Invitrogen                                                   |
| <b><i>Saccharomyces cerevisiae</i></b>              |                                                                             |                                                              |
| YPH500 (ATCC 76626)                                 | Homologous recombination of allelic exchange vector                         | Pahirulzaman <i>et al.</i> (2012) [15]                       |
| <b><i>Pseudomonas protegens</i></b>                 |                                                                             |                                                              |
| CHA0 (DSM 19095 <sup>T</sup> )                      | Wild-type for mutagenesis                                                   | German Collection of Microorganisms and Cell Cultures (DSMZ) |
| Pf-5 (ATCC BAA-477)                                 | Wild-type for mutagenesis                                                   | Howell and Stipanovic.(1979) [16]                            |
| CHA0 $\Delta$ <i>pgnD</i>                           | Mutant with clean deletion of fatty acyl-AMP ligase, <i>pgnD</i>            | This study                                                   |
| Pf-5 $\Delta$ <i>pgnD</i>                           | Mutant with clean deletion of fatty acyl-AMP ligase, <i>pgnD</i>            | This study                                                   |
| Pf-5 $\Delta$ <i>pgnE</i> - <i>Kan</i> <sup>R</sup> | <i>pgnE</i> gene replacement mutant with <i>Kan</i> <sup>R</sup> cassette   | This study                                                   |
| Pf-5 $\Delta$ <i>pgnF</i> - <i>Kan</i> <sup>R</sup> | <i>pgnF</i> gene replacement mutant with <i>Kan</i> <sup>R</sup> cassette   | This study                                                   |
| Pf-5 $\Delta$ <i>pgnH</i> - <i>Kan</i> <sup>R</sup> | <i>pgnH</i> gene replacement mutant with <i>Kan</i> <sup>R</sup> cassette   | This study                                                   |
| <b><i>T. caryophylli</i></b>                        |                                                                             |                                                              |
| Wild type (DSM50341)                                | Wild-type for mutagenesis                                                   | German Collection of Microorganisms and Cell Cultures (DSMZ) |
| $\Delta$ <i>cayB</i> - <i>Apr</i> <sup>R</sup>      | <i>cayB</i> gene replacement mutant with <i>Apr</i> <sup>R</sup> cassette   | This study                                                   |
| $\Delta$ <i>cayC</i> - <i>Apr</i> <sup>R</sup>      | <i>cayC</i> gene replacement mutant with <i>Apr</i> <sup>R</sup> cassette   | This study                                                   |
| $\Delta$ <i>cayE</i> - <i>Apr</i> <sup>R</sup>      | <i>cayE</i> gene replacement mutant with <i>Apr</i> <sup>R</sup> cassette   | This study                                                   |
| $\Delta$ <i>cayF</i> - <i>Apr</i> <sup>R</sup>      | <i>cayF</i> gene replacement mutant with <i>Apr</i> <sup>R</sup> cassette   | This study                                                   |
| <b>Plasmids</b>                                     |                                                                             |                                                              |
| pMQ30                                               | Allelic exchange vector                                                     | Shanks <i>et al.</i> (2006) [17]                             |
| pMQ30_F1_F2                                         | Recombinant allelic exchange vector with <i>pgnD</i> flanking homology arms | This study                                                   |
| pGEM-Kan                                            | Source of kanamycin resistance gene ( <i>Kan</i> <sup>R</sup> )             | Ishida, Lincke and Hertweck (2012) [18]                      |
| PIJ773                                              | Source of apramycin resistance gene ( <i>Apr</i> <sup>R</sup> )             | Gust <i>et al.</i> (2003) [19]                               |
| pJET1.2                                             | Introduce <i>Apr</i> <sup>R</sup> to target organism                        | Thermo Fisher Scientific                                     |
| pGL42a                                              | Introduce <i>Kan</i> <sup>R</sup> to target organism                        | Lackner, Moebius and Hertweck (2011) [20]                    |
