# Supplementary material for: Discovery of the Pseudomonas Polyyne Protegencin by a Phylogeny-Guided Study of Polyyne Biosynthetic Gene Cluster Diversity
Source: PubMed Central journal article supplement (PMC8406139; doi:10.1128/mbio.00715-21), 2021-08-03
Supplement: mbio.00715-21-st002.pdf [file mbio.00715-21-st002.pdf]

Table S2.  $^1\text{H}$  (500 MHz) and  $^{13}\text{C}$  (125 MHz) NMR spectroscopic data of protegencin.

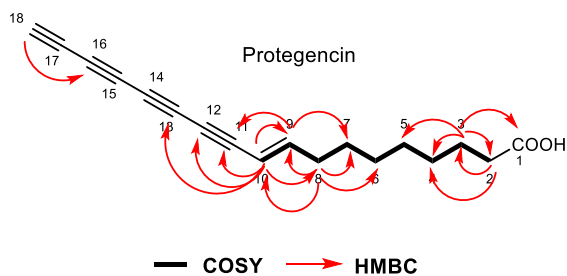

| Position | $\delta_{\text{H}}$ (J in Hz) | $\delta_{\text{C}}$ , type |
|----------|-------------------------------|----------------------------|
| 1        |                               | 175.0, C                   |
| 2        | 2.18, overlapped              | 34.1, CH <sub>2</sub>      |
| 3        | 1.47, t-like (6.0, 6.5)       | 24.9, CH <sub>2</sub>      |
| 4        | 1.25, overlapped              | 28.9, CH <sub>2</sub>      |
| 5        | 1.35, overlapped              | 28.8, CH <sub>2</sub>      |
| 6        | 1.34, overlapped              | 28.9, CH <sub>2</sub>      |
| 7        | 1.35, overlapped              | 28.0, CH <sub>2</sub>      |
| 8        | 2.15, overlapped              | 33.4, CH <sub>2</sub>      |
| 9        | 6.65, dt (16.0, 6.5)          | 155.4, CH                  |
| 10       | 5.79, d (16.0)                | 107.3, CH                  |
| 11       |                               | 78.0, C                    |
| 12       |                               | 72.3 C                     |
| 13       |                               | 61.6, C                    |
| 14       |                               | 65.8*, C                   |
| 15       |                               | 60.3*, C                   |
| 16       |                               | 64.2, C                    |
| 17       |                               | 72.3*, C                   |
| 18       | 4.06, s                       | 74.7, CH                   |

\*Might be interchanged.
