# Supplementary material for: Discovery of the Pseudomonas Polyyne Protegencin by a Phylogeny-Guided Study of Polyyne Biosynthetic Gene Cluster Diversity
Source: PubMed Central journal article supplement (PMC8406139; doi:10.1128/mbio.00715-21), 2021-08-03
Supplement: mbio.00715-21-st003.pdf [file mbio.00715-21-st003.pdf]

**Table S3. PCR primers used for *P. protegens* clean deletion mutagenesis.**

| Primers                                                                                                                                          | Final product size (bp)                                    | Primer use                                 | Ta (°C) <sup>a</sup> /DNA polymerase |
|--------------------------------------------------------------------------------------------------------------------------------------------------|------------------------------------------------------------|--------------------------------------------|--------------------------------------|
| <b>F1_fwd:</b> 5'-CACGACGTTGTAAAACGACGGCCAGTGCCAGGCCTGGACCTTGTCCAGTG-3'<br><b>F1_rev:</b> 5'-TGCCCGTCATGACAGGTTCAATTCAAAATCCTTTTTAAATGGAGAGCC-3' | 545                                                        | Amplify upstream fragment (F1)             | 62.5 / Q5                            |
| <b>F2_fwd:</b> 5'-GGATTTTGAATGAACCTGTCATGACGGCCATGAATC-3'<br><b>F2_rev:</b> 5'-ACACAGGAAACAGCTATGACCATGATTACGATCTGCATGATCAGTCGATC-3'             | 550                                                        | Amplify downstream fragment (F2)           | 65 / Q5                              |
| <b>M13_fwd:</b> 5'-AGGGTTTTCCCAGTCACGACGTT-3'<br><b>M13_rev:</b> 5'-GAGCGGATAACAATTTACACAGG-3'                                                   | 1,090 (pMQ30_F1_F2)<br>146 in (pMQ30)                      | Confirm recombinant pMQ30_F1_F2 construct  | 58 / <i>Taq</i>                      |
| <b>M13_fwd:</b> 5'-AGGGTTTTCCCAGTCACGACGTT-3'<br><b>Seq_chr_rev:</b> 5'-TACCGTCGGAATCGCCAGCC-3'                                                  | 3,132 (recombination at F1)<br>1,284 (recombination at F2) | Confirm transconjugant <i>P. protegens</i> | 60 / <i>Taq</i>                      |
| <b>Seq_chr_fwd:</b> 5'-CAGGACGAAAACCTGCTGAACAGGA-3'<br><b>M13_rev:</b> 5'-GAGCGGATAACAATTTACACAGG-3'                                             | 1,271 (recombination at F1)<br>3,119 (recombination at F2) | Confirm transconjugant <i>P. protegens</i> | 60 / <i>Taq</i>                      |
| <b>Seq_chr_fwd:</b> 5'-CAGGACGAAAACCTGCTGAACAGGA-3'<br><b>Seq_chr_rev:</b> 5'- TACCGTCGGAATCGCCAGC C-3'                                          | 3,313 (wild-type)<br>1,465 (clean deletion)                | Confirm <i>pgnD</i> clean deletion         | 62 / <i>Taq</i>                      |

<sup>a</sup>Ta = Annealing temperature
