# Supplementary material for: Discovery of the Pseudomonas Polyyne Protegencin by a Phylogeny-Guided Study of Polyyne Biosynthetic Gene Cluster Diversity
Source: PubMed Central journal article supplement (PMC8406139; doi:10.1128/mbio.00715-21), 2021-08-03
Supplement: mbio.00715-21-st004.pdf [file mbio.00715-21-st004.pdf]

**Table S4. PCR primers used for *P. protegens* and *T. caryophylli* gene replacement mutagenesis<sup>a</sup>.**

| <b><i>P. protegens</i></b>   |                                                                             |                                                                          |
|------------------------------|-----------------------------------------------------------------------------|--------------------------------------------------------------------------|
| <b>Gene</b>                  | <b>Forward primer</b>                                                       | <b>Reverse primer</b>                                                    |
| <i>pgnE</i> Fl1              | 5'- AAA AAA <u>CTA GTG</u> GCT GAC GGT CGC AAC TCC-3'                       | 5'- GCT ACT TAA TTA AGC TAG <u>CGT AGC</u> CCC TGG ATA TTG CCG ATA AA-3' |
| <i>pgnE</i> Fl2              | 5'-GCT ACG CTA GCT <u>TAA TTA AGT</u> AGC ATA ACC CGC<br>AGC TGG GAG-3'     | 5'- AAA <u>AAG AGC TCC</u> AGA AGA ACT CGT CAA GAA GGC G-3'              |
| <i>pgnF</i> Fl1              | 5'- AAA AAA <u>CTA GTA</u> CAC AGC GAC ACC AGA GGT C-3'                     | 5'-GCT ACT TAA TTA AGC TAG <u>CGT AGC</u> ATC AGC ATC AGG CTG CTC ATC-3' |
| <i>pgnF</i> Fl2              | 5'-GCT ACG CTA GCT <u>TAA TTA AGT</u> AGC ATC TTC GTC<br>GCC AAC CAG GCG-3' | 5'- AAA <u>AAG AGC TCT</u> GCG GAC TTT GTC GAT CAT TG-3'                 |
| <i>pgnH</i> Fl1              | 5'- AAA AAA <u>CTA GTA</u> CGC TCT CAG GAG ATC GAG GG-3'                    | 5'-GCT ACT TAA TTA AGC TAG <u>CGT AGC</u> TGC ATG TTG TGC ATG TGG C-3'   |
| <i>pgnH</i> Fl2              | 5'-GCT ACG CTA GCT <u>TAA TTA AGT</u> AGC AAC<br>GGC TAC CTG AAG CTC-3'     | 5'- AAA <u>AAG AGC TCT</u> TCG GCC ACC TTG ACG TTC TC -3'                |
| <i>Kan<sup>R</sup></i>       | 5'-GCT ACG <u>CTA GCG</u> TAA GCT TAG GCT GCT GCC-3'                        | 5'-GCT <u>ACT TAA TTA ATC</u> AGA AA ACT CGT CAA GAA GGC G -3'           |
| <b><i>T. caryophylli</i></b> |                                                                             |                                                                          |
| <b>Gene</b>                  | <b>Forward primer</b>                                                       | <b>Reverse primer</b>                                                    |
| <i>cayB</i> Fl1              | 5'-ATC AGC ATC CGC ATG CGT C-3'                                             | 5'-GCT ACT TAA TTA AGC TAG <u>CGT AGC</u> GTC GCC TTC CTG ATC GGT-3'     |
| <i>cayB</i> Fl2              | 5'-GCT ACG CTA GCT <u>TAA TTA AGT</u> AGC ATC GGC GGA<br>ACT GCG TAC-3'     | 5'-GCT CGA TGA ACG AGC CGG A-3'                                          |
| <i>cayC</i> Fl1              | 5'-ACG TAT CAA GGC GTT GAC CGC-3'                                           | 5'-GCT ACT TAA TTA AGC TAG <u>CGT AGC</u> ACC CAG AAT AGA ATC GGA C-3'   |
| <i>cayC</i> Fl2              | 5'-GCT ACG CTA GCT <u>TAA TTA AGT</u> AGC ATT GCC AAT<br>CAG TTC GCG-3'     | 5'-GAC GCG GTC GAT CAT GT-3'                                             |
| <i>cayE</i> Fl1              | 5'-ATT CAG CTA CCC CGA CAG C-3'                                             | 5'-GCT ACT TAA TTA AGC TAG <u>CGT AGC</u> ATG CAG GTT ATG CAT GTG-3'     |
| <i>cayE</i> Fl2              | 5'-GCT ACG CTA GCT <u>TAA TTA AGT</u> AGC ATC ACA TCT<br>CGG ATG ATC-3'     | 5'-CGA CTG GTA ATA GCC GTG CA-3'                                         |
| <i>cayF</i> Fl1              | 5'-ACA GAG CAG TCC ATT CTT CG-3'                                            | 5'-GCT ACT TAA TTA AGC TAG <u>CGT AGC</u> AAC ATC GTG CTG CTG TCG-3'     |
| <i>Apr<sup>R</sup></i>       | 5'-GCT ACG <u>CTA GCA</u> TTC CGG GGA TCC GTC GAC C-3'                      | 5'-GCT <u>ACT TAA TTA ATG</u> TAG GCT GGA GCT GCT TC-3'                  |

<sup>a</sup>Restriction sites are underlined.
